# Supplementary material
Source: HighWire-hosted journal article supplement (http://www.jrheum.org/highwire/filestream/29802/field_highwire_adjunct_files/0/151210DataSuppl.pdf)
Supplement: 151210DataSuppl.pdf [file 151210DataSuppl.pdf]

## ONLINE SUPPLEMENTARY DATA

### *Short Telephone Questionnaire*

Good morning/afternoon, my name is \_\_\_\_\_.

About 6 month ago you were in a rheumatology consultation at Dr. \_\_\_\_\_'s office and we would like to know how you are doing today.

Would you be so kind as to answer some short questions? Your answers will be kept confidential and will be used only for research purposes.

0 Yes      0 No

Question 1: Rate the severity of pain on a scale of 0 to 100 (0 no pain, 100 unbearable pain).

Answer: \_\_\_\_\_

Question 2: Do you still require medical care because of the complaints you consulted our practice?

0 Yes      0 No

If yes:

a. Which diagnosis was made?

b. Who is treating you currently?

c. Which treatment (drugs or something else) do you get because of this complaints?

Thank you very much.

*Supplementary Table 1.* Alterations from initial suspected diagnosis to final diagnosis after 6 months.

| Initial RAC diagnoses (N)   | Diagnoses after 6 months |     |      |     |     |                    |    |         |                        |              |       |
|-----------------------------|--------------------------|-----|------|-----|-----|--------------------|----|---------|------------------------|--------------|-------|
|                             | RA                       | SPA | Gout | CTD | PMR | Other inflammatory | OA | FMS/CSS | Other non-inflammatory | Symptom-free | Total |
| RA (59)                     | 55                       | 1   | 0    | 0   | 0   | 0                  | 2  | 0       | 0                      | 1            | 59    |
| SPA (46)                    | 0                        | 38  | 0    | 0   | 0   | 2                  | 1  | 0       | 2                      | 2            | 45    |
| Gout (12)                   | 1                        | 0   | 11   | 0   | 0   | 0                  | 0  | 0       | 0                      | 0            | 12    |
| CTD (7)                     | 0                        | 0   | 0    | 7   | 0   | 0                  | 0  | 0       | 0                      | 0            | 7     |
| PMR (23)                    | 0                        | 0   | 0    | 0   | 21  | 0                  | 1  | 0       | 0                      | 0            | 22    |
| Other inflammatory (29)     | 2                        | 4   | 4    | 0   | 1   | 11                 | 4  | 0       | 2                      | 1            | 29    |
| OA (85)                     | 0                        | 0   | 0    | 0   | 0   | 0                  | 79 | 0       | 1                      | 0            | 80    |
| FMS/CSS (9)                 | 0                        | 0   | 0    | 0   | 0   | 0                  | 0  | 8       | 1                      | 0            | 9     |
| Other non-inflammatory (65) | 2                        | 0   | 0    | 1   | 0   | 0                  | 1  | 1       | 55                     | 2            | 62    |
| Total (335)                 | 60                       | 43  | 15   | 8   | 22  | 13                 | 88 | 9       | 61                     | 6            | 325   |

RA; rheumatoid arthritis, SpA; spondyloarthritis, CTD; connective tissue disease, PMR; polymyalgia rheumatica, OA; osteoarthritis, FMS/CSS; fibromyalgia syndrome / central sensitivity syndrome

Supplementary Table 2. Therapy after 6 months.

| Diagnosis                | Number of patients | Methotrexate | Glucocorticoids | Biologics | Sulfasalazine | Antimalarials | Allopurinol | Cholchicine | NSAIDs     | Analgesics | Antidepressants | Other treatment | No treatment | Combination therapy |
|--------------------------|--------------------|--------------|-----------------|-----------|---------------|---------------|-------------|-------------|------------|------------|-----------------|-----------------|--------------|---------------------|
| RA                       | 60                 | 51           | 30              | 11        | 4             |               |             |             | 13         | 1          |                 | 8               |              | 43                  |
| SpA                      | 43                 | 19           | 8               | 9         | 3             |               | 1           |             | 16         | 3          |                 | 12              | 2            | 22                  |
| Gout                     | 15                 |              |                 |           |               |               | 9           | 6           | 8          |            |                 | 1               |              | 9                   |
| CTD                      | 8                  |              | 1               |           |               | 2             |             |             | 4          | 1          | 2               | 4               |              | 4                   |
| PMR                      | 22                 |              | 21              |           |               | 1             |             |             | 2          | 1          |                 | 6               |              | 7                   |
| "Other inflammatory"     | 13                 | 1            | 5               |           | 1             |               | 1           |             | 7          |            |                 | 2               |              | 4                   |
| OA                       | 88                 | 2*           | 10              |           |               | 1             | 1           |             | 42         | 5          |                 | 22              | 5            | 24                  |
| FMS/CSS                  | 9                  |              |                 |           |               |               |             |             | 2          | 4          | 5               | 3               |              | 5                   |
| "Other non-inflammatory" | 61                 |              | 3               |           |               |               |             |             | 25         | 3          | 3               | 18              | 3            | 12                  |
| Free of symptoms         | 6                  |              | 1               |           |               |               |             |             |            |            |                 |                 | 1            |                     |
| <b>Total</b>             | <b>325</b>         | <b>73</b>    | <b>79</b>       | <b>20</b> | <b>8</b>      | <b>4</b>      | <b>12</b>   | <b>6</b>    | <b>119</b> | <b>18</b>  | <b>10</b>       | <b>76</b>       | <b>11</b>    | <b>130</b>          |

\* 2 patients with erosive osteoarthritis of the hands. RA; rheumatoid arthritis, SpA; spondyloarthritis, CTD; connective tissue disease, PMR; polymyalgia rheumatica, OA; osteoarthritis, FMS/CSS; fibromyalgia syndrome / central sensitivity syndrome.
